1 **Full title:**

2 Evaluation of the second-generation whole-heart motion correction algorithm (SSF2)

3 used to demonstrate the aortic annulus on cardiac CT

4

5 **Short title:**

6 Clinical utility of SSF2 in the aortic annulus

7

8 **Authors:**

9 Yoriaki Matsumoto<sup>1\*</sup>, Chikako Fujioka<sup>1</sup>, Kazushi Yokomachi<sup>1</sup>, Nobuo Kitera<sup>1</sup>, Eiji

10 Nishimaru<sup>1</sup>, Masao Kiguchi<sup>1</sup>, Toru Higaki<sup>2</sup>, Ikuo Kawashita<sup>2</sup>, Fuminari Tatsugami<sup>2</sup>,

11 Yuko Nakamura<sup>2</sup>, Kazuo Awai<sup>2</sup>

12

13 1) Department of Radiology, Hiroshima University Hospital, Kasumi, Minami-ku,

14 Hiroshima, Japan.

15 2) Department of Diagnostic Radiology, Graduate School of Biomedical and Health

16 Sciences, Hiroshima University, Kasumi, Minami-ku, Hiroshima, Japan.

17

18 \* Corresponding author

19 E-mail: yoriaki@hiroshima-u.ac.jp (YM)

20

## 21 **Abstract**

22 **Purpose:** To investigate the usefulness of the second-generation whole-heart motion  
23 correction algorithm (SnapShot Freeze 2.0, SSF2) for demonstrating the aortic annulus  
24 at pre-transcatheter aortic valve implantation cardiac CT.

25 **Method:** We retrospectively analyzed 90 patients with severe aortic stenosis who had  
26 undergone cardiac CT on a 256-row CT scanner. The patients were divided into the 3  
27 groups based on their heart rate during the scan (low, < 60 bpm, n = 30; intermediate,  
28 60-69 bpm, n = 30; high, >70 bpm, n = 30). Image datasets were obtained at 40% and  
29 75% of the R-R interval using standard and SSF2 reconstruction. The edge rise distance  
30 (ERD) on the CT attenuation profile of the aortic annulus was compared on images  
31 subjected to standard- and SSF2 reconstructions. The standard deviations (SD) of area  
32 and perimeter were compared using the *F*-test. The image quality was assessed by two  
33 observers using a 5-point Likert score.

34 **Results:** In patients with intermediate and high heart rates, the ERD was significantly  
35 shorter on SSF2- than standard reconstructed images ( $p < 0.01$ ). The SD of area and  
36 perimeter were significantly smaller in SSF2 reconstruction than in standard (all:  $p <$   
37  $0.05$ ). Except for R-R interval 75% in patients with low heart rate ( $p = 0.54$ ), the image  
38 quality scores were significantly higher for images reconstructed with SSF2 than

39 standard ( $p < 0.01$ ).

40 **Conclusions:** For the demonstration of the aortic annulus in patients with high heart

41 rate or a 40% R-R interval, SSF2- was superior to standard reconstruction.

42

43 **Abbreviations:** bpm: beats per minute, CT: computed tomography, CNR:

44 contrast-to-noise ratio, ERD: edge rise distance, MPR: multiplanar reconstruction, ROI:

45 region of interest, SD: standard deviation, SSF: SnapShot Freeze, TAVI: transcatheter

46 aortic valve implantation

47

## 48 **Introduction**

49           Electrocardiogram-gated cardiac computed tomography (CT) scans are  
50 important for planning the transcatheter aortic valve implantation (TAVI) procedure in  
51 patients with severe aortic stenosis [1, 2]. However, motion artifacts present a technical  
52 challenge because they can compromise the assessment of structures such as the  
53 coronary arteries and valves, especially in patients with a high heart rate [3-7].  
54 Inaccurate sizing increases the risk of complications such as perivalvular leak or rupture  
55 in TAVI patients [2, 8, 9]. Precise pre-procedural imaging is therefore crucial to assure  
56 optimal patient outcome [2, 9]. To avoid motion artifacts, the society of cardiovascular  
57 CT guidelines [10] recommend that the heart rate be controlled to be less than 60 beats  
58 per minute (bpm) by the oral or intravenous administration of a  $\beta$ -blocker. To correct  
59 motion artifacts, technical advances in CT systems have improved the temporal  
60 resolution, increased the gantry rotation speed, and applied dual-source CT and  
61 multi-segment reconstruction; software solutions have been developed [11].

62           The first-generation motion correction algorithm (SnapShot Freeze, SSF1; GE  
63 Healthcare) is vendor-specific and designed to address coronary motion artifacts on  
64 cardiac scans. Its application significantly improved the image quality of the coronary  
65 arteries in patients with a high heart rate [12-19]. A second-generation vendor-specific

66 motion correction algorithm (SnapShot Freeze 2.0, SSF2; GE Healthcare) extended the  
67 motion correction range to the whole heart within one scan volume [20, 21]. We  
68 examined whether the SSF2 algorithm improves the image quality of cardiac CT scans  
69 acquired to evaluate not only the coronary arteries but also the aortic valves. We  
70 enrolled patients with severe aortic stenosis who had undergone pre-TAVI standard  
71 cardiac CT studies without motion correction and pre-TAVI scans subjected to SSF2  
72 reconstruction and compared their image quality.  
73

## 74 **Materials and methods**

75           This retrospective study (No. E-2623, Clinical study of motion correction  
76 algorithm for cardiac CT) was approved by our institutional review board; informed  
77 patient consent for the analyses was waived.

78

## 79 **Study population**

80           We enrolled 108 patients with severe aortic stenosis who underwent cardiac CT  
81 as candidates for TAVI between April 2021 and February 2022. Inclusion criteria were  
82 patients who underwent contrast-enhanced cardiac CT. Our exclusion criteria were  
83 severe renal failure (estimated glomerular filtration rate < 30 ml/min/1.73 m<sup>2</sup>, 15  
84 patients), poor breath holding during scanning (1 patient), extravasation during contrast  
85 injection (1 patient) or refusal of CT examination (1 patient). Thus, the final study  
86 population consisted of 90 patients; they were 33 male and 57 female ranging in age  
87 from 70 to 95 years (median age, 84 years).

88           To perform stratified analysis of the effect of SSF2 on heart rate during scanning,  
89 we divided 90 patients into 3 groups to include the same number of patients according  
90 to the relationship between heart rate and image quality [10, 12, 17, 18, 20, 22-24]. In  
91 group 1 (n = 30) the heart rate was low (< 60 bpm, range 34 -59 bpm), in group 2 (n =

92 30) it was intermediate (60 - 69 bpm), and in group 3 (n = 30) it was high (70 bpm or  
93 higher, range 70 - 119 bpm).

94

## 95 **CT scanning**

96 All patients were scanned on a 256-detector row CT scanner (Revolution CT;  
97 GE Healthcare, Milwaukee, WI, USA); prospective electrocardiogram-gated axial scans  
98 were acquired. The scanning- and reconstruction parameters were tube voltage, 120  
99 kVp; tube current, selected by automatic tube current modulation (Smart-mA, GE  
100 Healthcare) based on the scout image; noise index, 25; detector collimation, 256 ×  
101 0.625 mm or 224 × 0.625 mm depending on the patient's heart size; gantry rotation,  
102 0.28 seconds; slice thickness, 0.625 mm; scan field of view, 360 mm; display field of  
103 view, 200 mm; matrix, 512 × 512; reconstruction, half; reconstruction kernel, HD  
104 standard; reconstruction method, deep learning image reconstruction (TrueFidelity,  
105 strength High; GE Healthcare) [25-28]. The padding range was 0 - 100% of the R-R  
106 interval when a heart rate of less than 60 bpm was recorded during pre-examination  
107 monitoring; when it exceeded 60 bpm or was variable. In the presence of arrhythmia the  
108 padding range was 0 - 250%. All scans were craniocaudal from the tracheal bifurcation  
109 to the level of the inferior margin of the cardiac apex. All patients were able to perform



110 breath-holds during the examination. To achieve high image quality with minimal  
111 radiation doses, patients with a heart rate above 60 bpm 5 minutes before the start of  
112 scanning were given 2 - 10 mg propranolol hydrochloride (Inderal; Taiyo Holdings Co.,  
113 Ltd., Tokyo, Japan).

114 The contrast medium (iodine concentration 350 mg/ml; Iomeron-350; Eisai Co.,  
115 Ltd., Tokyo, Japan) was injected in triple-phase through a 20- or 22-gauge catheter into  
116 the antecubital vein using a power injector (Dual Shot type GX; Nemoto Kyorindo,  
117 Tokyo, Japan). The iodine dose of 273 mg/kg in the first phase was administered in 13  
118 seconds. This injection was followed at a speed of 5 seconds by a 50/50 mix of contrast  
119 medium (53 mgI/kg) and saline, and finally 100% saline was delivered at the same  
120 injection speed. The scanning delay was determined with a bolus-tracking method. A  
121 round, approximately 400 mm<sup>2</sup> region of interest (ROI) was placed in the center of the  
122 left atrium and left ventricle, respectively. Scanning was started manually 1 second after  
123 contrast enhancement exceeded a predefined threshold of 300 Hounsfield units.

124

## 125 **Data processing**

126 Similar to the SSF1 algorithm [17, 19], the SSF2 algorithm uses data from  
127 adjacent cardiac phases (64 milliseconds before and after the target phase) to

128 characterize and correct the motion. The SSF2 algorithm, a fully automated technique  
129 based on information and feedback obtained from SSF1 scans, seeks each region at all  
130 image volumes for a local path that is consistent with the subset of measured data. Once  
131 the vessel's motion path is identified, the data are discretized into a series of datasets  
132 based on when the corresponding projection rays were measured. Each volume dataset  
133 in the series undergoes spatial deformation by the motion field. This allows the motion  
134 state to be mapped from the respective time to the central reference time, which is  
135 determined by the prescribed cardiac phase [29].

136 All images were reconstructed using the standard (without motion correction)  
137 algorithm with deep-learning image reconstruction for reducing the image noise [25-28].  
138 For the cardiac phase, the systolic- (R-R interval, 40%) and diastolic phase (R-R  
139 interval, 75%) used for pre-TAVI cardiac CT measurements were selected [2, 4, 29, 30].  
140 As the systolic- and diastolic phases were additionally subjected to SSF2 reconstruction,  
141 4 datasets were obtained for each patient. They were anonymized and transferred to the  
142 workstation (Advantage Workstation 4.7, GE Healthcare) for later analysis.

143

## 144 **Quantitative evaluation**

145 The attenuation effect elicited by motion artifacts was analyzed at the aortic

146 annulus. All images were inspected by one radiological technologist (Y.M. with 15  
147 years of experience with cardiac CT studies). To assess the aortic annulus, only axial-  
148 and 2D double-oblique multiplanar reconstruction (MPR) images were examined. The  
149 aortic annulus was defined as a virtual ring formed by joining the basal attachments of  
150 the aortic leaflets [2, 31].

### 151 **Edge rise distance**

152 We generated a 3-directional CT attenuation profile (anterior-, superior-, and  
153 inferior direction) of the aortic annulus (Fig 1) using the particle analysis tool (Plot  
154 Profile) on the workstation (Ziostation2, Ziosoft, Tokyo, Japan). Areas of calcification  
155 where CT attenuation fluctuates significantly were carefully avoided. The CT  
156 attenuation profiles were generated at precisely the same location for images  
157 reconstructed with standard and SSF2. We cut off the bottom and top 10% of the profile  
158 and measured the 10 - 90% edge rise distance (ERD) [32, 33]. The ERD was examined  
159 in three directions of the aortic annulus and the mean values were compared on  
160 standard- and SFF2 images.

161

162 **Fig 1. Sample image of ERD.** Profile curve of the aortic annulus. The ERD at a pixel  
163 attenuation from 10% to 90% of the maximum CT attenuation is shown. CT =

164 computed tomography; HU = Hounsfield units; ERD = edge rise distance

165

## 166 **Dispersion of sizing**

167 With respect to the sizing of the aortic annulus, we evaluated the dispersion  
168 between the two reconstructions. All images were analyzed by two radiological  
169 technologists (Y.M. and C.F., with 15 and 18 years of experience in cardiac CT imaging,  
170 respectively). They were blinded to presence of SSF2 technique and manually measured  
171 the aortic annulus area and perimeter of all patients independently on a CT workstation  
172 (Ziostation2, Ziosoft, Tokyo, Japan).

## 173 **Contrast-to-noise ratio**

174 To investigate the potential effect of SSF2 reconstruction on the quantitative  
175 ERD measurements, we inspected axial images and recorded the CT number and image  
176 noise [standard deviation (SD) of the CT number] in a circular ROI placed in the  
177 ascending aorta and septal wall of the ventricle. The size of the circular ROI cursor was  
178 as large as allowed by the diameter of the ascending aorta (approximately 5.0 - 10.0  
179 mm<sup>2</sup>) and of the septal wall of the ventricle (approximately 1.5 - 3.0 mm<sup>2</sup>). Based on the  
180 obtained values we also calculated the contrast-to-noise ratio (CNR) using the formula:  
181 (CT number of the ascending aorta minus the CT number of the septal wall of the

182 ventricle) divided by the image noise of the ascending aorta [34].

183

## 184 **Qualitative analysis**

185 Two radiological technologists (Y.M. and C.F., with 15 and 18 years of  
186 experience in cardiac CT imaging, respectively) were blinded to presence of the SSF2  
187 technique. They subjectively and independently inspected the MPR images from the  
188 sinotubular junction to the left ventricular outflow tract of the datasets for motion  
189 artifacts at the aortic annulus level. To grade the image quality they used the 5-point  
190 Likert scale where 1 = very poor (motion artifacts resulting in poor visualization of the  
191 aortic valve anatomy, not evaluable), 2 = poor (degraded visualization of the aortic  
192 valve anatomy due to motion artifacts, not evaluable), 3 = fair (minor motion artifacts  
193 with clear delineation of the aortic valve anatomy), 4 = good (no motion artifacts with  
194 confident identification of the aortic root anatomy including the cusp nadirs and annular  
195 contours), and 5 = excellent (outstanding image quality with a high level of diagnostic  
196 certainty with regard to the aortic valve cusps, the leaflet nadirs, and the detection of the  
197 aortic annular contours) [29]. Interobserver disagreement was resolved by consensus.

198

## 199 **Statistical analysis**

200 Continuous variables of demographic data, ERD, CT number, image noise and  
201 CNR are expressed as the median and range or as percentages or counts, aortic annulus  
202 area and perimeter or image quality scores as the mean and SD. The results of ERD, CT  
203 number, image noise, CNR and image quality scores were compared on images  
204 reconstructed with standard and SSF2 using the Mann-Whitney *U*-test. To compare the  
205 dispersion (SD) of area and perimeter between the two reconstructions we used the  
206 *F*-test. To determine whether the CNR was equivalent in standard and SSF2  
207 reconstructions, we performed the equivalence test [35]. As the SD of the CNR between  
208 the proximal coronary arteries and the adjacent perivascular tissue was 5 in our earlier  
209 study [33], we adopted 5 as the equivalent margin. Interobserver agreement in the  
210 qualitative evaluation was classified as evaluable (score 3 - 5) and non-evaluable (score  
211 1, 2) assessed with the Cohen kappa  $\kappa$  coefficient where a  $\kappa$  value of less than 0.20 =  
212 poor, 0.21 - 0.40 = fair, 0.41 - 0.60 = moderate, 0.61 - 0.80 = substantial, and 0.81 - 1.00  
213 = near perfect agreement. All statistical analyses were performed with JMP 16 (SAS  
214 Institute Inc., Cary, NC, USA). Differences of  $p < 0.05$  were considered statistically  
215 significant.  
216

217 **Results**

218 **Patient demographic data**

219 As shown in Table 1, the median overall heart rate during CT image acquisition was 64 bpm (range: 34 - 119 bpm). Of the 90  
 220 patients, 70 were in sinus rhythm and 20 exhibited arrhythmias (atrial fibrillation, 19 patients; premature atrial contraction, 1 patient).

221 **Table 1. Patient characteristics.**

|                                                                    | Overall           | Patients with low HR (<60 bpm) | Patients with intermediate HR (60-69 bpm) | Patients with high HR (>70 bpm) |
|--------------------------------------------------------------------|-------------------|--------------------------------|-------------------------------------------|---------------------------------|
| Number of patients                                                 | 90                | 30                             | 30                                        | 30                              |
| Age (years)                                                        | 84 (70-95)        | 85 (70-95)                     | 84 (70-91)                                | 84 (74-94)                      |
| Male, n (%)                                                        | 33 (37%)          | 14 (42%)                       | 11 (33%)                                  | 8 (25%)                         |
| Height (cm)                                                        | 151 (130-169)     | 153 (137-167)                  | 149 (130-169)                             | 150 (135-169)                   |
| Body weight (kg)                                                   | 51 (33-76)        | 50 (33-68)                     | 53 (33-73)                                | 52 (35-76)                      |
| Body mass index (kg/m <sup>2</sup> )                               | 22.4 (13.6-36.9)  | 21.7 (13.6-26.6)               | 22.9 (15.5-36.9)                          | 22.7 (15.8-34.6)                |
| estimated glomerular filtration rate (ml/min/1.73 m <sup>2</sup> ) | 51.0 (30.3-115.5) | 46.9 (30.3-115.5)              | 50.6 (31.3-87.3)                          | 52.9 (31.0-82.8)                |
| Heart rate during the scan (beats/min)                             | 64 (34-119)       | 53 (34-59)                     | 64 (60-69)                                | 80 (70-119)                     |
| No. of patients with arrhythmias during the scan, n (%)            | 20 (22%)          | 6 (30%)                        | 3 (15%)                                   | 11 (55%)                        |

|                                                        |          |          |          |          |
|--------------------------------------------------------|----------|----------|----------|----------|
| Atrial fibrillation, n (%)                             | 19 (21%) | 6 (31%)  | 3 (16%)  | 10 (53%) |
| Premature atrial contraction, n (%)                    | 1 (1%)   | 0 (0%)   | 0 (0%)   | 1 (100%) |
| No. of patients using propranolol hydrochloride, n (%) | 69 (77%) | 17 (25%) | 23 (33%) | 29 (42%) |

222 Values are the median (range) or the number of patients (%).

223 Propranolol hydrochloride was administered to reduce the heart rate before imaging.

224

## 225 **Quantitative evaluation**

### 226 **Edge rise distance**

227 We analyzed 1080 ERDs (3 directions  $\times$  4 datasets  $\times$  90 patients). The ERD measurement results are presented in Table 2. In  
 228 patients with a low heart rate, the ERD obtained with standard and SSF2 reconstruction was not significantly different (R-R 40% and  
 229 R-R 75%:  $p > 0.05$ ). However, in patients with an intermediate heart rate, the ERD at R-R 40% was significantly shorter on SSF2 (2.0  
 230 mm)- than standard (2.4 mm) images ( $p < 0.001$ ). In patients whose heart rate was high, the ERD at R-R 40% and R-R 75% was  
 231 significantly shorter on SSF2- than standard images ( $p < 0.001$ ).



232 **Table 2. Comparison of the edge rise distance (mm) on scans subjected to**  
 233 **standard- and SSF2 reconstruction.**

|                                           | R-R interval | Standard      | SSF2          | <i>P</i> |
|-------------------------------------------|--------------|---------------|---------------|----------|
| Patients with low HR (<60 bpm)            | 40%          | 1.8 (1.0-4.2) | 1.6 (0.9-4.0) | 0.067    |
|                                           | 75%          | 1.9 (1.0-4.2) | 1.8 (0.9-4.1) | 0.122    |
| Patients with intermediate HR (60-69 bpm) | 40%          | 2.4 (0.9-5.1) | 2.0 (0.9-4.5) | <0.001   |
|                                           | 75%          | 2.1 (1.0-5.1) | 2.1 (0.9-4.1) | 0.077    |
| Patients with high HR (>70 bpm)           | 40%          | 2.5 (1.1-5.7) | 2.0 (1.0-5.2) | <0.001   |
|                                           | 75%          | 2.5 (1.1-5.9) | 2.0 (1.0-4.9) | <0.001   |

234 HR = heart rate. Values are the median (range).

235

### 236 **Dispersion of sizing**

237 As shown in Table 3, the SD of the aortic annulus area was significantly smaller  
 238 in SSF2 reconstruction than in standard at low (94.7 vs 63.3 and 105.2 vs 78.9)-,  
 239 intermediate (71.8 vs 47.9 and 90.4 vs 58.3)-, and high heart rate (58.7 vs 45.1 and 70.3  
 240 vs 45.8) R-R interval of 40% and 75% (all:  $p < 0.05$ ).

241 **Table 3. Comparison of SD of the aortic annulus areas (mm<sup>2</sup>) of scans subjected to**  
 242 **standard- and SSF2 reconstruction.**

|                                           | R-R interval | Standard      | SSF2         | <i>P</i> |
|-------------------------------------------|--------------|---------------|--------------|----------|
| Patients with low HR (<60 bpm)            | 40%          | 448.7 (94.7)  | 436.5 (63.3) | 0.002    |
|                                           | 75%          | 428.9 (105.2) | 435.0 (78.9) | 0.029    |
| Patients with intermediate HR (60-69 bpm) | 40%          | 442.1 (71.8)  | 435.5 (47.9) | 0.002    |
|                                           | 75%          | 445.8 (90.4)  | 439.4 (58.3) | 0.001    |
| Patients with high HR (>70 bpm)           | 40%          | 437.4 (58.7)  | 435.8 (45.1) | 0.002    |
|                                           | 75%          | 432.3 (70.3)  | 414.6 (45.8) | 0.001    |

243 HR = heart rate, bpm = beats per minute. Values are the mean (SD).

244 As shown in Table 4, the SD of the aortic annulus perimeter was also  
 245 significantly smaller in SSF2 reconstruction than in standard at low (11.6 vs 7.4 and 9.5  
 246 vs 6.0)-, intermediate (9.4 vs 5.6 and 10.8 vs 6.8)-, and high heart rate (8.4 vs 4.3 and  
 247 9.3 vs 5.4) R-R interval of 40% and 75% (all:  $p < 0.001$ ).

248 **Table 4. Comparison of SD of the aortic annulus perimeter (mm) of scans**  
 249 **subjected to standard- and SSF2 reconstruction.**

|                                           | R-R interval | Standard    | SSF2       | <i>P</i> |
|-------------------------------------------|--------------|-------------|------------|----------|
| Patients with low HR (<60 bpm)            | 40%          | 75.0 (11.6) | 75.6 (7.4) | <0.001   |
|                                           | 75%          | 75.4 (9.5)  | 74.7 (6.0) | <0.001   |
| Patients with intermediate HR (60-69 bpm) | 40%          | 74.6 (9.4)  | 74.0 (5.6) | <0.001   |
|                                           | 75%          | 77.0 (10.8) | 75.7 (6.8) | <0.001   |
| Patients with high HR (>70 bpm)           | 40%          | 74.8 (8.4)  | 73.3 (4.3) | <0.001   |
|                                           | 75%          | 71.5 (9.3)  | 71.3 (5.4) | <0.001   |

250 HR = heart rate, bpm = beats per minute. Values are the mean (SD).

### 251 **Contrast-to-noise ratio**

252 As shown in Table 5, the CT number of the ascending aorta and the septal wall  
 253 of the ventricle and the image noise of the ascending aorta showed no significant  
 254 difference between the two reconstructions, irrespective of the patients' heart rate (all:  $p$   
 255  $> 0.05$ ). In addition, these CNR also showed no significant difference between the two  
 256 reconstructions at low (18.5 vs 19.5,  $p = 0.404$ )-, intermediate (16.5 vs 16.3,  $p = 0.860$ )-,  
 257 and high heart rate (17.6 vs 18.1,  $p = 0.312$ ). The 95% confidence interval for the  
 258 difference between standard and SSF2 reconstruction was  $-3.0$  to  $1.2$  in patients with a  
 259 low heart rate,  $-2.5$  to  $2.1$  in patients with an intermediate heart rate, and  $-2.7$  to  $0.9$  in  
 260 patients with a high heart rate. Because the 95% confidence interval did not cross the  
 261 bilateral predefined equivalence margin (Fig 2) in all heart rate classes, we

262 considered CNR to be equivalent among our standard and SSF2 reconstitution irrespective of their heart rate.

263 **Table 5. CT number, image noise and contrast-to-noise ratio at each site.**

|                                           |                                                | Standard            | SSF2                | <i>P</i> |
|-------------------------------------------|------------------------------------------------|---------------------|---------------------|----------|
| Patients with low HR (<60 bpm)            | CT number of the ascending aorta (HU)          | 401.7 (204.7-478.9) | 400.7 (205.0-478.9) | 0.928    |
|                                           | Image noise of the ascending aorta             | 16.9 (13.1-22.3)    | 16.3 (11.6-22.2)    | 0.206    |
|                                           | CT number of septal wall of the ventricle (HU) | 83.4 (59.5-116.0)   | 85.6 (56.7-115.0)   | 0.601    |
|                                           | Contrast-to-noise ratio                        | 18.5 (8.5-24.1)     | 19.5 (9.0-26.9)     | 0.404    |
| Patients with intermediate HR (60-69 bpm) | CT number of the ascending aorta (HU)          | 375.0 (308.8-490.0) | 380.6 (299.0-492.5) | 0.962    |
|                                           | Image noise of the ascending aorta             | 17.3 (13.0-26.5)    | 17.7 (13.0-27.5)    | 0.818    |
|                                           | CT number of septal wall of the ventricle (HU) | 81.1 (55.9-111.1)   | 82.5 (49.3-115.0)   | 0.904    |
|                                           | Contrast-to-noise ratio                        | 16.5 (11.5-30.8)    | 16.3 (9.9-31.0)     | 0.860    |
| Patients with high HR (>70 bpm)           | CT number of the ascending aorta (HU)          | 400.0 (314.5-531.7) | 400.0 (295.5-528.7) | 0.885    |
|                                           | Image noise of the ascending aorta             | 18.1 (15.5-23.5)    | 17.0 (13.9-22.0)    | 0.161    |
|                                           | CT number of septal wall of the ventricle (HU) | 80.5 (59.5-117.4)   | 83.4 (56.7-123.2)   | 0.982    |
|                                           | Contrast-to-noise ratio                        | 17.6 (11.7-24.0)    | 18.1 (13.3-24.0)    | 0.312    |

264 HR = heart rate, HU = Hounsfield units. Values are the median (range).

265

266 **Fig 2. Results of the equivalence test.** Results of the equivalence test for the difference in CNR between standard and SSF2

267 reconstruction. CNR = contrast-to-noise ratio; HR = heart rate; SSF2 = SnapShot Freeze 2

268

## 269 **Qualitative analysis**

270 Table 6 shows the results of the visual evaluation of MPR images submitted by  
271 our two readers. In patients with a low heart rate, at R-R 75%, there was no significant  
272 difference in the mean image scores assigned to images subjected to standard- or SSF2  
273 reconstruction ( $p = 0.540$ ). At R-R 40% the visualization scores were significantly  
274 higher for images reconstructed with SSF2 than standard (all:  $p < 0.01$ ). There was  
275 substantial interobserver agreement with respect to the overall image quality ( $\kappa = 0.69$ ).  
276 SSF2 reconstruction improved the image quality of the aortic annulus in the  
277 representative case shown in Fig 3.

278 **Table 6. Comparison of the image quality scores of scans subjected to standard-**  
279 **and SSF2 reconstruction.**

|                                           | R-R interval | Standard  | SSF2      | <i>P</i> |
|-------------------------------------------|--------------|-----------|-----------|----------|
| Patients with low HR (<60 bpm)            | 40%          | 2.6 (1.1) | 3.6 (0.7) | <0.001   |
|                                           | 75%          | 3.9 (0.9) | 4.0 (0.7) | 0.540    |
| Patients with intermediate HR (60-69 bpm) | 40%          | 2.1 (0.9) | 3.5 (0.6) | <0.001   |
|                                           | 75%          | 2.9 (0.8) | 3.6 (0.7) | 0.003    |
| Patients with high HR (>70 bpm)           | 40%          | 2.5 (0.7) | 3.7 (0.4) | <0.001   |
|                                           | 75%          | 2.2 (0.7) | 3.2 (0.6) | <0.001   |

280 HR = heart rate, bpm = beats per minute. Values are the mean (SD).

281

282 **Fig 3. Clinical image of SSF2.** In their 80s (height = 157 cm, body weight = 58 kg,  
283 body mass index = 23.5 kg/m<sup>2</sup>, heart rate during the scan = 116 bpm (atrial fibrillation).  
284 (A) and (C): MPR images of the aortic annulus (R-R interval = 40% and 75%) using  
285 standard reconstruction. The visualization scores for A and C were 1 and 2, respectively.

286 (B) and (D): After SSF2 reconstruction, both visualization scores were 4. The evaluable

287 image quality improved. WW = window width; WL = window level

288

## 289 **Discussion**

290 Our study demonstrates that the second-generation whole-heart motion  
291 correction algorithm (SSF2) was superior to standard reconstruction with respect to the  
292 image quality of pre-TAVI cardiac CT scans acquired for the evaluation of the aortic  
293 annulus.

294 At R-R 40%, SSF2 reconstructed images received significantly higher image  
295 quality scores than did standard reconstruction regardless of the patients' heart rate ( $p <$   
296  $0.001$ ). At R-R 75%, in patients with an intermediate and high heart rate was the  
297 visualization score higher for SSF2- than standard reconstructed images. At R-R 40%  
298 and R-R 75%, SSF2 strongly tended to yield higher image quality scores than did  
299 standard reconstruction. Consequently, SSF2 reconstruction raised the image quality  
300 significantly, especially in patients with a high heart rate or a 40% R-R interval.

301 The earlier vendor-specific motion correction algorithm (SSF1) was designed to  
302 address coronary motion artifacts on cardiac scans. It was primarily indicated for  
303 coronary imaging and was shown to improve the image quality and diagnostic accuracy  
304 of scans performed for the detection of significant coronary stenosis, especially in  
305 patients with a high heart rate [12-19]. The SSF2 algorithm extends motion correction to  
306 include the whole heart. It is expected to be useful for imaging of not only the coronary  
307 arteries but also of other non-coronary intracardiac structures such as the cardiac valves.

308 Earlier studies that applied SSF2 reconstruction to images of the coronary  
309 arteries, of heart- and valve structures, and of the great vessels showed that the image  
310 quality was significantly improved by the algorithm and the number of non-evaluable  
311 scans was lower than of images subjected to standard- or SSF1 reconstruction [20, 21].

312 Our study focused on the aortic annulus; it indicates that SSF2 yielded higher motion  
313 artifact correction in the whole heart.

314 Others [29] who applied SSF1 to cardiac CT for aortic annulus measurements  
315 reported that it significantly improved the image quality of systolic CT datasets. We  
316 examined the effect of SSF2 in a wide range of heart rates and showed that it is useful  
317 for the evaluation of the aortic annulus not only in the systolic- but also in the diastolic  
318 phase. Our findings suggest that SSF2 reconstruction reduces aortic valve motion  
319 artifacts throughout the cardiac phases.

320 SSF2 reconstruction was not useful at R-R interval 75% in patients with a low or  
321 intermediate heart rate. At those heart rates and cardiac phases, the temporal resolution  
322 on electrocardiogram-gated scans may be sufficient and motion artifacts may not be  
323 inherent. SSF1- and SSF2 reconstruction may be useful in patients with a high heart rate  
324 and for scans with low temporal resolution [12, 13, 20, 21]. Our findings suggest that  
325 SSF2 is as useful as SSF1 in patients with a high heart rate.

326 Although cardiac CT is the reference standard for the workup of TAVI  
327 candidates scheduled for an investigation of the aortic root [1, 2], motion artifacts  
328 reduce the accuracy of aortic annulus sizing and directly impact on patient outcome  
329 after TAVI procedure [2, 7-9]. As a result of evaluating the dispersion between the two  
330 reconstructions with respect to the sizing of the aortic annulus, SSF2 was significantly  
331 smaller than standard regardless of the patients' heart rate or R-R interval. For TAVI  
332 planning, we still tend to use systolic imaging for the measurements [2, 4, 29, 30] and  
333 the aortic annulus seems to be better delineated when SSF2 is used. Therefore, SSF2  
334 may contribute to improving the accuracy of sizing of the aortic annulus.

335 As renal dysfunction is relatively common in elderly patients scheduled for

336 TAVI, a low-contrast protocol is recommended [36]. SSF2 reconstruction may be  
337 appropriate in TAVI candidates with renal dysfunction because it not only improves the  
338 image quality but also reduces the need for rescanning.

339 To avoid the potential impact of SSF2 reconstruction on quantitative  
340 measurements of the ERD, we measured the CT number in the ascending aorta, the  
341 image noise, and the CNR on SSF2 reconstructed images. We found that CNR was  
342 equivalent between scans subjected to standard- or SSF2 reconstruction irrespective of  
343 the patients' heart rate, confirming that SSF2 corrected only the motion artifacts and that  
344 it did not affect other parameters.

345 Our study has some limitations. We only focused on the aortic annulus and did  
346 not investigate the effect of SSF2 on other cardiac structures such as the coronary  
347 arteries. Areas of calcification were excluded from our quantitative evaluation because  
348 their CT attenuation fluctuates significantly. Severe aortic valve calcification could  
349 reduce the sizing accuracy of the aortic annulus and further study is required to evaluate  
350 whether SSF2- is superior to standard reconstruction in patients with severe aortic valve  
351 calcification. Lastly, we did not investigate the relationship between SSF2 and the  
352 radiation dose. Additional studies are underway to determine whether the robustness of  
353 SSF2 reconstruction allows lowering the preset padding range prior to scanning, thereby  
354 minimizing the required radiation dose.

355



## 356 **Conclusions**

357           In conclusion, our findings suggest that the SSF2 algorithm was superior to  
358 standard reconstruction because it improved the image quality and reduces motion  
359 artifacts especially in patients with a high heart rate or a 40% R-R interval. These  
360 findings may help SSF2 improve the accuracy of sizing of the aortic annulus prior to  
361 TAVI.  
362

363 **Supporting information**

364 **S1 Table. Raw data for each group. (XLSX)**

365

## 366 **References**

- 367 1. Schuhbaeck A, Achenbach S, Pfleiderer T, Marwan M, Schmid J, Nef H, et al.  
368 Reproducibility of aortic annulus measurements by computed tomography. *Eur Radiol.*  
369 2014;24(8):1878-88.
- 370 2. Achenbach S, Delgado V, Hausleiter J, Schoenhagen P, Min JK, Leipsic JA.  
371 SCCT expert consensus document on computed tomography imaging before  
372 transcatheter aortic valve implantation (TAVI)/transcatheter aortic valve replacement  
373 (TAVR). *J Cardiovasc Comput Tomogr.* 2012;6(6):366-80.
- 374 3. Andreini D, Pontone G, Mushtaq S, Mancini ME, Conte E, Guglielmo M, et al.  
375 Image quality and radiation dose of coronary CT angiography performed with  
376 whole-heart coverage CT scanner with intra-cycle motion correction algorithm in  
377 patients with atrial fibrillation. *Eur Radiol.* 2018;28(4):1383-92.
- 378 4. Binder RK, Webb JG, Willson AB, Urena M, Hansson NC, Norgaard BL, et al.  
379 The impact of integration of a multidetector computed tomography annulus area sizing  
380 algorithm on outcomes of transcatheter aortic valve replacement: a prospective,  
381 multicenter, controlled trial. *J Am Coll Cardiol.* 2013;62(5):431-8.
- 382 5. Harris BS, De Cecco CN, Schoepf UJ, Steinberg DH, Bayer RR, Krazinski AW,  
383 et al. Dual-source CT imaging to plan transcatheter aortic valve replacement: accuracy  
384 for diagnosis of obstructive coronary artery disease. *Radiology.* 2015;275(1):80-8.
- 385 6. Kodali S, Thourani VH, White J, Malaisrie SC, Lim S, Greason KL, et al. Early  
386 clinical and echocardiographic outcomes after SAPIEN 3 transcatheter aortic valve  
387 replacement in inoperable, high-risk and intermediate-risk patients with aortic stenosis.  
388 *Eur Heart J.* 2016;37(28):2252-62.

- 389 7. Makkar RR, Fontana GP, Jilaihawi H, Kapadia S, Pichard AD, Douglas PS, et  
390 al. Transcatheter aortic-valve replacement for inoperable severe aortic stenosis. *N Engl J*  
391 *Med.* 2012;366(18):1696-704.
- 392 8. Holmes DR, Jr., Mack MJ, Kaul S, Agnihotri A, Alexander KP, Bailey SR, et al.  
393 2012 ACCF/AATS/SCAI/STS expert consensus document on transcatheter aortic valve  
394 replacement. *J Am Coll Cardiol.* 2012;59(13):1200-54.
- 395 9. Schmidkonz C, Marwan M, Klinghammer L, Mitschke M, Schuhbaeck A,  
396 Arnold M, et al. Interobserver variability of CT angiography for evaluation of aortic  
397 annulus dimensions prior to transcatheter aortic valve implantation (TAVI). *Eur J Radiol.*  
398 2014;83(9):1672-8.
- 399 10. Leipsic J, Abbara S, Achenbach S, Cury R, Earls JP, Mancini GJ, et al. SCCT  
400 guidelines for the interpretation and reporting of coronary CT angiography: a report of  
401 the Society of Cardiovascular Computed Tomography Guidelines Committee. *J*  
402 *Cardiovasc Comput Tomogr.* 2014;8(5):342-58.
- 403 11. Aghayev A, Murphy DJ, Keraliya AR, Steigner ML. Recent developments in  
404 the use of computed tomography scanners in coronary artery imaging. *Expert Rev Med*  
405 *Devices.* 2016;13(6):545-53.
- 406 12. Liang J, Wang H, Xu L, Dong L, Fan Z, Wang R, et al. Impact of SSF on  
407 Diagnostic Performance of Coronary Computed Tomography Angiography Within 1  
408 Heart Beat in Patients With High Heart Rate Using a 256-Row Detector Computed  
409 Tomography. *J Comput Assist Tomogr.* 2018;42(1):54-61.
- 410 13. Wen B, Xu L, Liang J, Fan Z, Sun Z. A Preliminary Study of Computed  
411 Tomography Coronary Angiography Within a Single Cardiac Cycle in Patients With  
412 Atrial Fibrillation Using 256-Row Detector Computed Tomography. *J Comput Assist*

- 413 Tomogr. 2018;42(2):277-81.
- 414 14. Liang J, Wang H, Xu L, Yang L, Dong L, Fan Z, et al. Diagnostic performance  
415 of 256-row detector coronary CT angiography in patients with high heart rates within a  
416 single cardiac cycle: a preliminary study. *Clin Radiol.* 2017;72(8):694 e7- e14.
- 417 15. Sheta HM, Egstrup K, Husic M, Heinsen LJ, Nieman K, Lambrechtsen J.  
418 Impact of a motion correction algorithm on image quality in patients undergoing CT  
419 angiography: A randomized controlled trial. *Clin Imaging.* 2017;42:1-6.
- 420 16. Sheta HM, Egstrup K, Husic M, Heinsen LJ, Lambrechtsen J. Impact of a  
421 motion correction algorithm on quality and diagnostic utility in unselected patients  
422 undergoing coronary CT angiography. *Clin Imaging.* 2016;40(2):217-21.
- 423 17. Machida H, Lin XZ, Fukui R, Shen Y, Suzuki S, Tanaka I, et al. Influence of  
424 the motion correction algorithm on the quality and interpretability of images of  
425 single-source 64-detector coronary CT angiography among patients grouped by heart  
426 rate. *Jpn J Radiol.* 2015;33(2):84-93.
- 427 18. Lee H, Kim JA, Lee JS, Suh J, Paik SH, Park JS. Impact of a vendor-specific  
428 motion-correction algorithm on image quality, interpretability, and diagnostic  
429 performance of daily routine coronary CT angiography: influence of heart rate on the  
430 effect of motion-correction. *Int J Cardiovasc Imaging.* 2014;30(8):1603-12.
- 431 19. Leipsic J, Labounty TM, Hague CJ, Mancini GB, O'Brien JM, Wood DA, et al.  
432 Effect of a novel vendor-specific motion-correction algorithm on image quality and  
433 diagnostic accuracy in persons undergoing coronary CT angiography without  
434 rate-control medications. *J Cardiovasc Comput Tomogr.* 2012;6(3):164-71.
- 435 20. Liang J, Sun Y, Ye Z, Sun Y, Xu L, Zhou Z, et al. Second-generation motion  
436 correction algorithm improves diagnostic accuracy of single-beat coronary CT

- 437 angiography in patients with increased heart rate. *Eur Radiol.* 2019;29(8):4215-27.
- 438 21. Sun J, Okerlund D, Cao Y, Li H, Zhu Y, Li J, et al. Further Improving Image  
439 Quality of Cardiovascular Computed Tomography Angiography for Children With High  
440 Heart Rates Using Second-Generation Motion Correction Algorithm. *J Comput Assist*  
441 *Tomogr.* 2020;44(5):790-5.
- 442 22. Mushtaq S, Conte E, Melotti E, Andreini D. Coronary CT Angiography in  
443 Challenging Patients: High Heart Rate and Atrial Fibrillation. A Review. *Acad Radiol.*  
444 2019;26(11):1544-9.
- 445 23. Le Roy J, Zargane H, Azais B, Vernhet Kovacsik H, Mura T, Okerlund D, et al.  
446 Impact of Motion Correction Algorithms on Image Quality in Children Undergoing  
447 Coronary Computed Tomography Angiography: A Comparison With Regular  
448 Monophasic and Multiphasic Acquisitions. *Circ Cardiovasc Imaging.*  
449 2019;12(12):e009650.
- 450 24. Fuchs TA, Stehli J, Dougoud S, Fiechter M, Sah BR, Buechel RR, et al. Impact  
451 of a new motion-correction algorithm on image quality of low-dose coronary CT  
452 angiography in patients with insufficient heart rate control. *Acad Radiol.*  
453 2014;21(3):312-7.
- 454 25. Lell MM, Kachelriess M. Recent and Upcoming Technological Developments  
455 in Computed Tomography: High Speed, Low Dose, Deep Learning, Multienergy. *Invest*  
456 *Radiol.* 2020;55(1):8-19.
- 457 26. Greffier J, Hamard A, Pereira F, Barrau C, Pasquier H, Beregi JP, et al. Image  
458 quality and dose reduction opportunity of deep learning image reconstruction algorithm  
459 for CT: a phantom study. *Eur Radiol.* 2020;30(7):3951-9.
- 460 27. Solomon J, Lyu P, Marin D, Samei E. Noise and spatial resolution properties of

- 461 a commercially available deep learning-based CT reconstruction algorithm. *Med Phys.*  
462 2020;47(9):3961-71.
- 463 28. Benz DC, Benetos G, Rampidis G, von Felten E, Bakula A, Sustar A, et al.  
464 Validation of deep-learning image reconstruction for coronary computed tomography  
465 angiography: Impact on noise, image quality and diagnostic accuracy. *J Cardiovasc*  
466 *Comput Tomogr.* 2020;14(5):444-51.
- 467 29. Soon J, Sulaiman N, Park JK, Kueh SH, Naoum C, Murphy D, et al. The effect  
468 of a whole heart motion-correction algorithm on CT image quality and measurement  
469 reproducibility in Pre-TAVR aortic annulus evaluation. *J Cardiovasc Comput Tomogr.*  
470 2016;10(5):386-90.
- 471 30. Apfaltrer P, Henzler T, Blanke P, Krazinski AW, Silverman JR, Schoepf UJ.  
472 Computed tomography for planning transcatheter aortic valve replacement. *J Thorac*  
473 *Imaging.* 2013;28(4):231-9.
- 474 31. Rixe J, Schuhbaeck A, Liebetrau C, Moellmann H, Nef HM, Szardien S, et al.  
475 Multi-detector computed tomography is equivalent to trans-oesophageal  
476 echocardiography for the assessment of the aortic annulus before transcatheter aortic  
477 valve implantation. *Eur Radiol.* 2012;22(12):2662-9.
- 478 32. Tatsugami F, Higaki T, Sakane H, Fukumoto W, Kaichi Y, Iida M, et al.  
479 Coronary Artery Stent Evaluation with Model-based Iterative Reconstruction at  
480 Coronary CT Angiography. *Acad Radiol.* 2017;24(8):975-81.
- 481 33. Tatsugami F, Higaki T, Nakamura Y, Yu Z, Zhou J, Lu Y, et al. Deep  
482 learning-based image restoration algorithm for coronary CT angiography. *Eur Radiol.*  
483 2019;29(10):5322-9.
- 484 34. Gupta AK, Nelson RC, Johnson GA, Paulson EK, Delong DM, Yoshizumi TT.

485 Optimization of eight-element multi-detector row helical CT technology for evaluation  
486 of the abdomen. *Radiology*. 2003;227(3):739-45.

487 35. Piaggio G, Elbourne DR, Pocock SJ, Evans SJ, Altman DG, Group C.  
488 Reporting of noninferiority and equivalence randomized trials: extension of the  
489 CONSORT 2010 statement. *JAMA*. 2012;308(24):2594-604.

490 36. Geyer LL, De Cecco CN, Schoepf UJ, Silverman JR, Krazinski AW, Bamberg  
491 F, et al. Low-volume contrast medium protocol for comprehensive cardiac and  
492 aortoiliac CT assessment in the context of transcatheter aortic valve replacement. *Acad*  
493 *Radiol*. 2015;22(9):1138-46.

494



CT attenuation (HU)

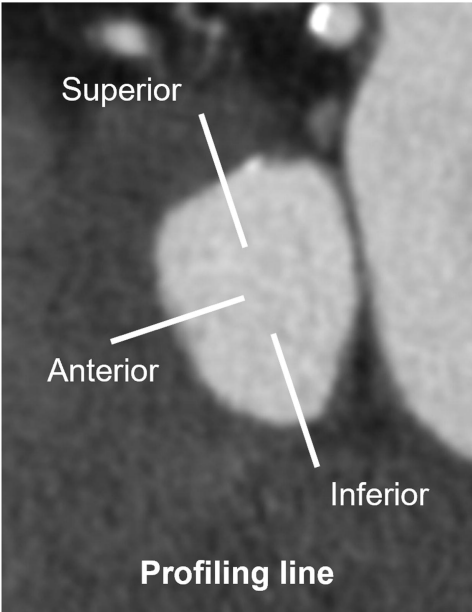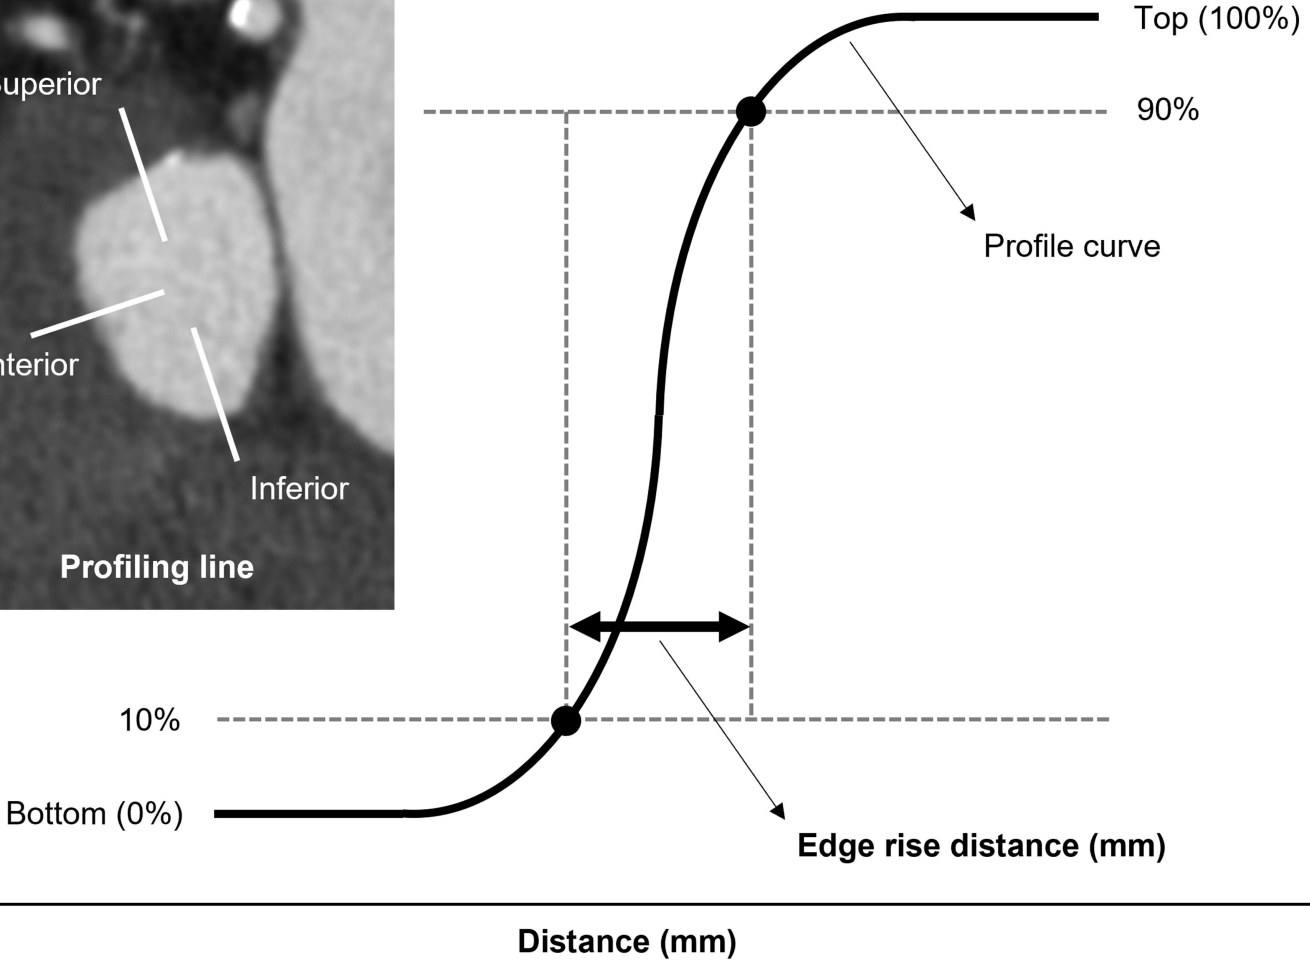

# Contrast-to-noise ratio

Equivalent margin

Equivalent margin

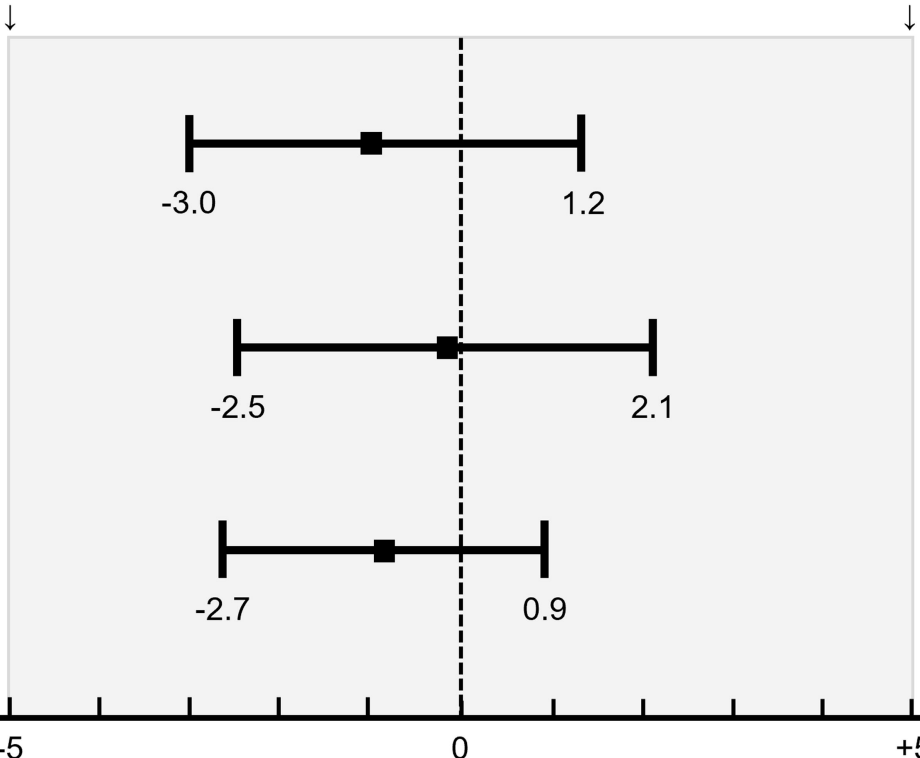

Patients with low HR

-3.0

1.2

Patients with intermediate HR

-2.5

2.1

Patients with high HR

-2.7

0.9

-5

0

+5

Difference in contrast-to-noise ratio  
[Standard reconstruction] - [SSF2 reconstruction]

**Standard  
reconstruction**

**SnapShot Freeze 2  
reconstruction**

**R-R  
interval  
40%**

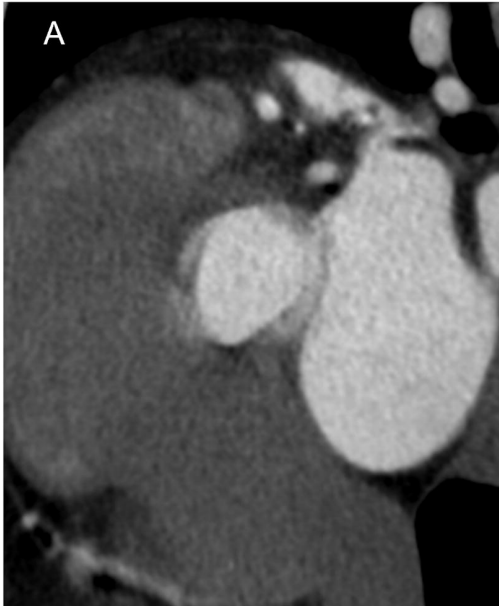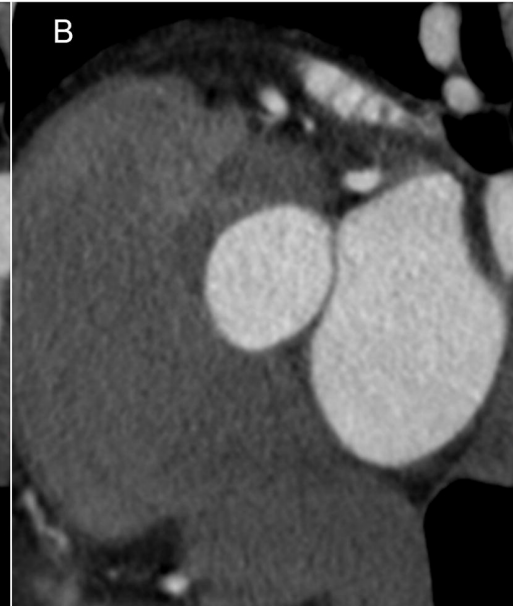

**R-R  
interval  
75%**

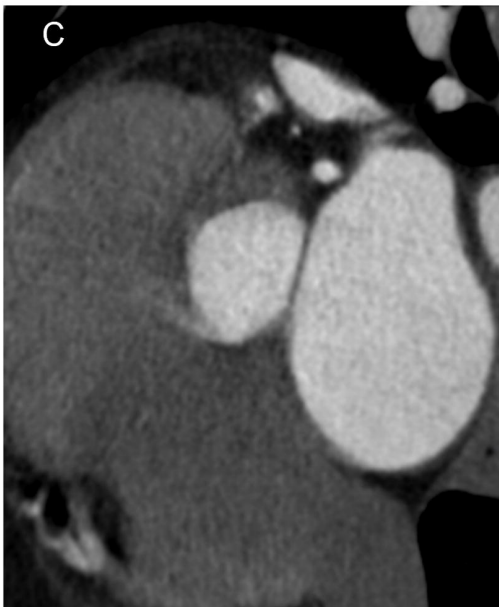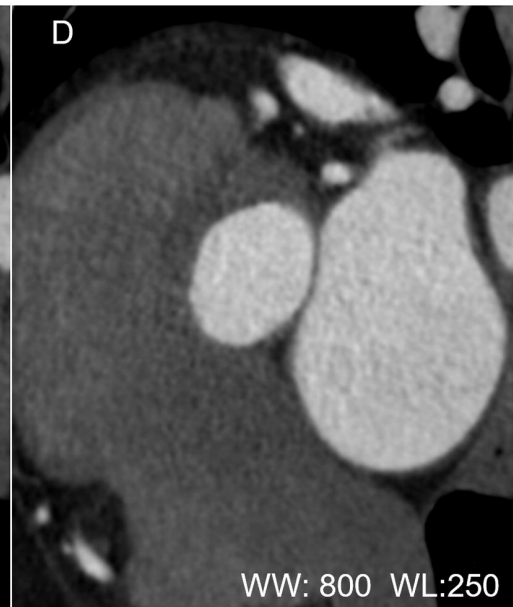

WW: 800 WL:250
